# Supplementary material
Source: HighWire-hosted journal article supplement (http://www.jrheum.org/highwire/filestream/29704/field_highwire_adjunct_files/0/150168DataSuppl.pdf)
Supplement: 150168DataSuppl.pdf [file 150168DataSuppl.pdf]

## ONLINE SUPPLEMENTARY DATA

**Supplementary Figure 1. NGT Panel AA1: Prioritized barriers to medication decision-making (n=8)**

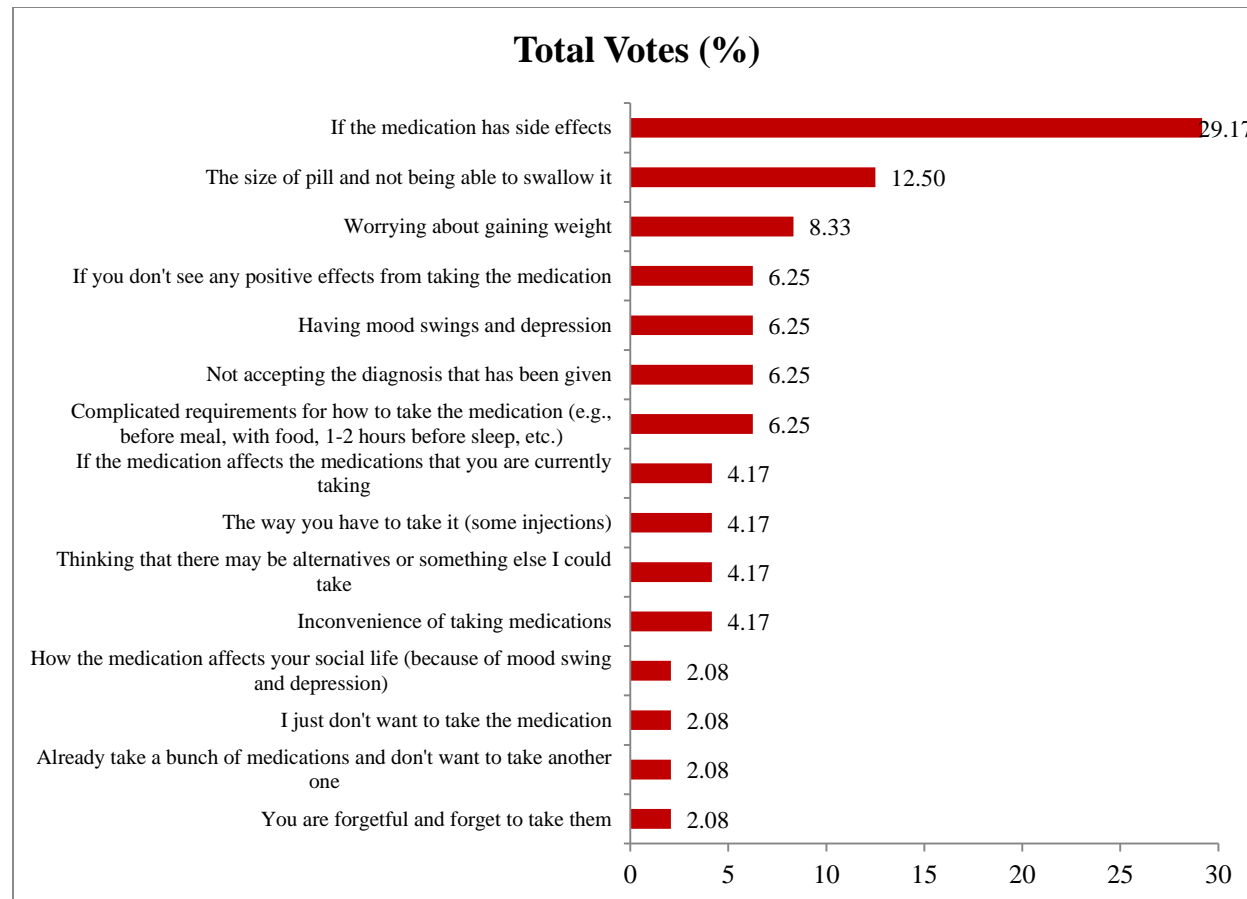

**Supplementary Figure 2. NGT Panel AA2: Prioritized barriers to medication decision-making (n=7)**

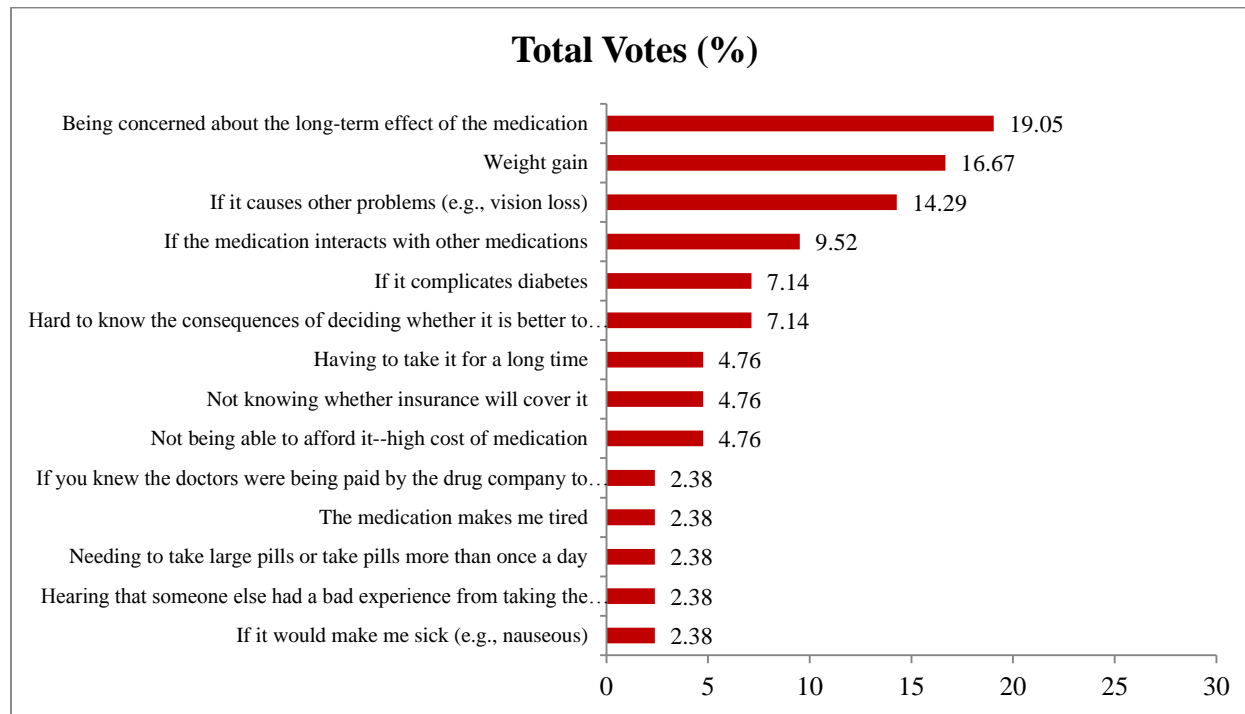

**Supplementary Figure 3. NGT Panel AA3: Prioritized barriers to medication decision-making (n=7)**

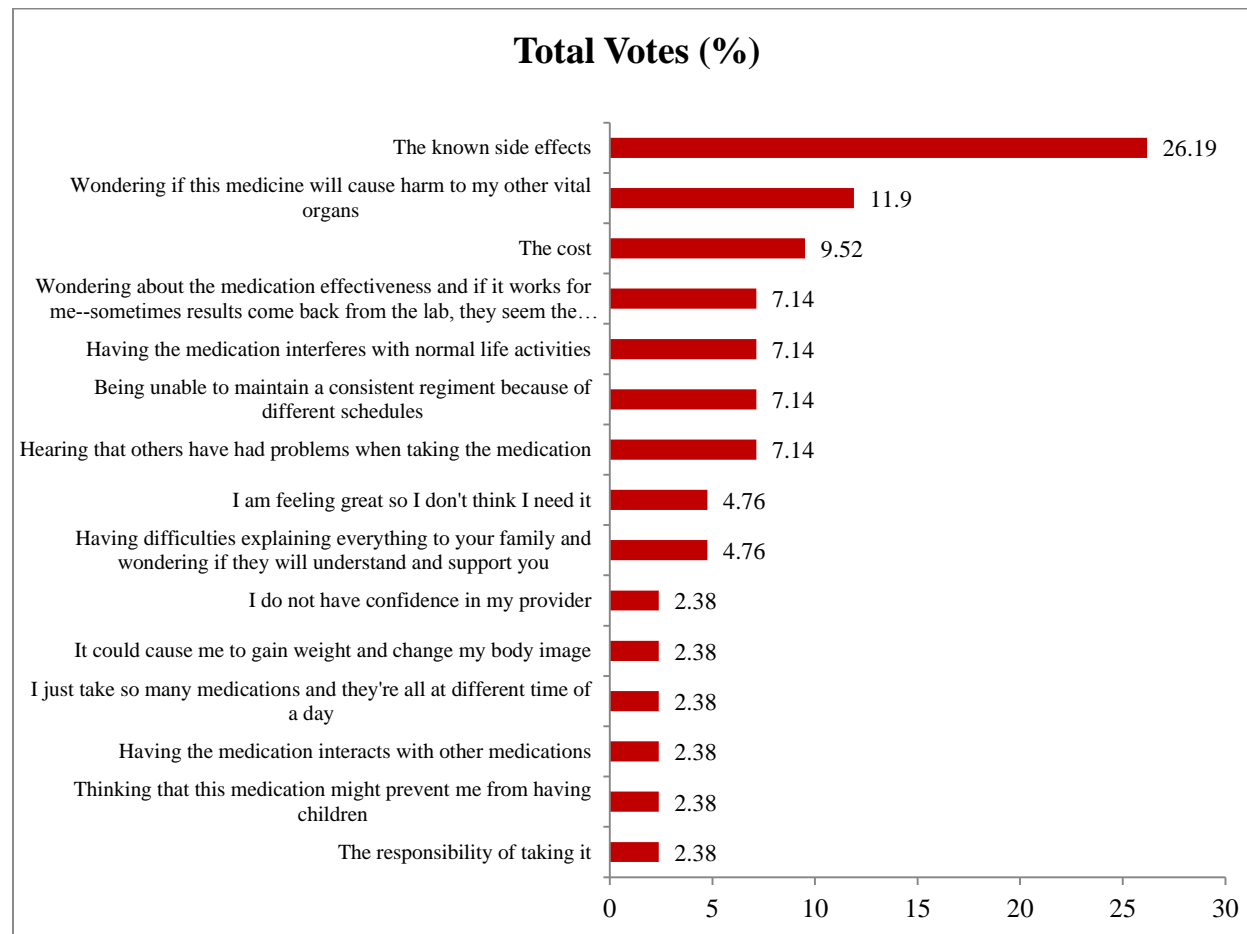

**Supplementary Figure 4. NGT Panel AA4: Prioritized barriers to medication decision-making (n=6)**

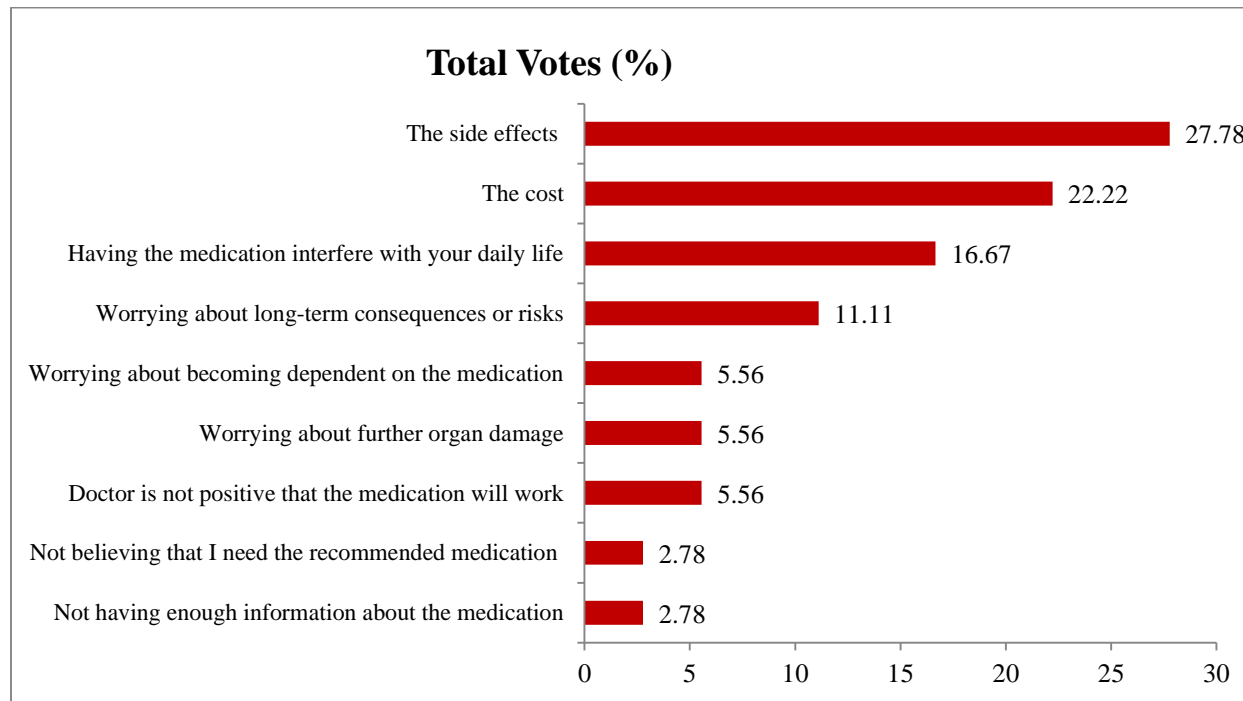

**Supplementary Figure 5. NGT Panel CA5: Prioritized barriers to medication decision-making (n=4)<sup>a</sup>**

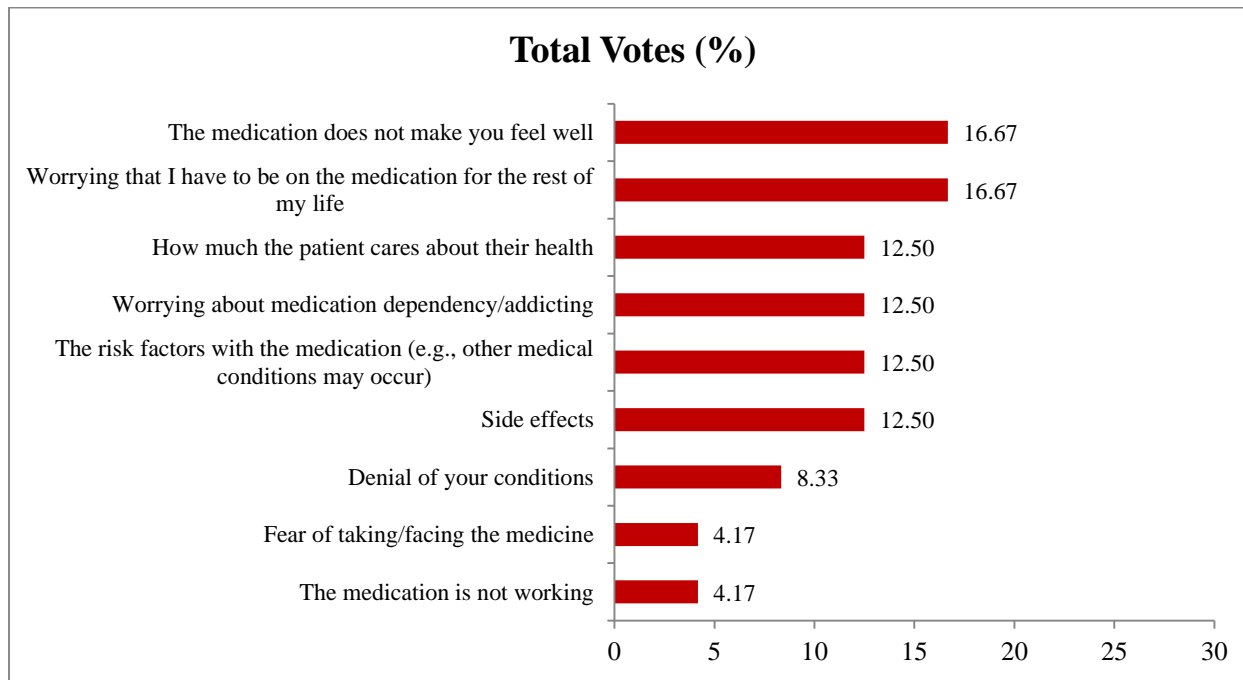

Note: <sup>a</sup> Caution should be used when using the results given the small n because it does not meet the recommended number.

**Supplementary Figure 6. NGT Panel CA6: Prioritized barriers to medication decision-making (n=6)**

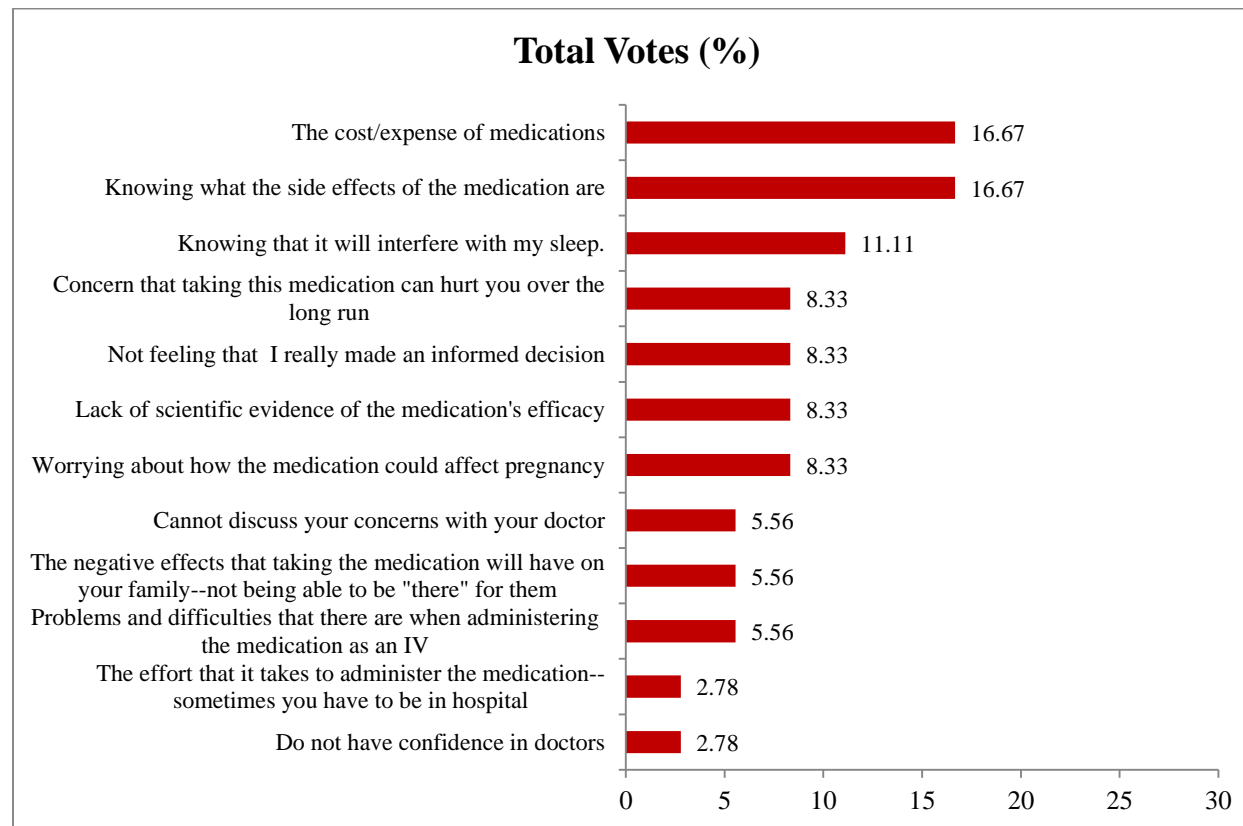

**Supplementary Figure 7. NGT Panel HA7: Prioritized barriers to medication decision-making (n=6)**

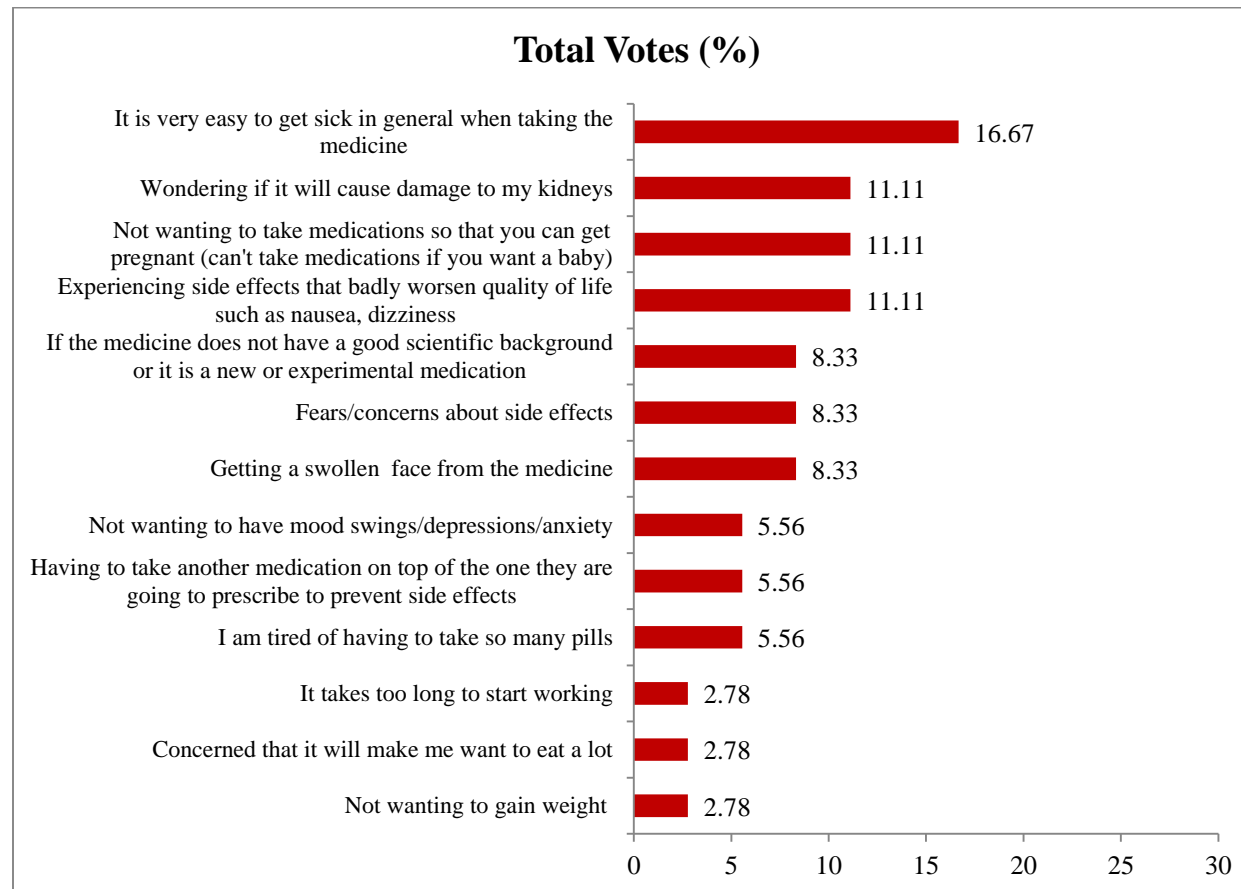

**Supplementary Figure 8. NGT Panel HA8: Prioritized barriers to medication decision-making (n=7)**

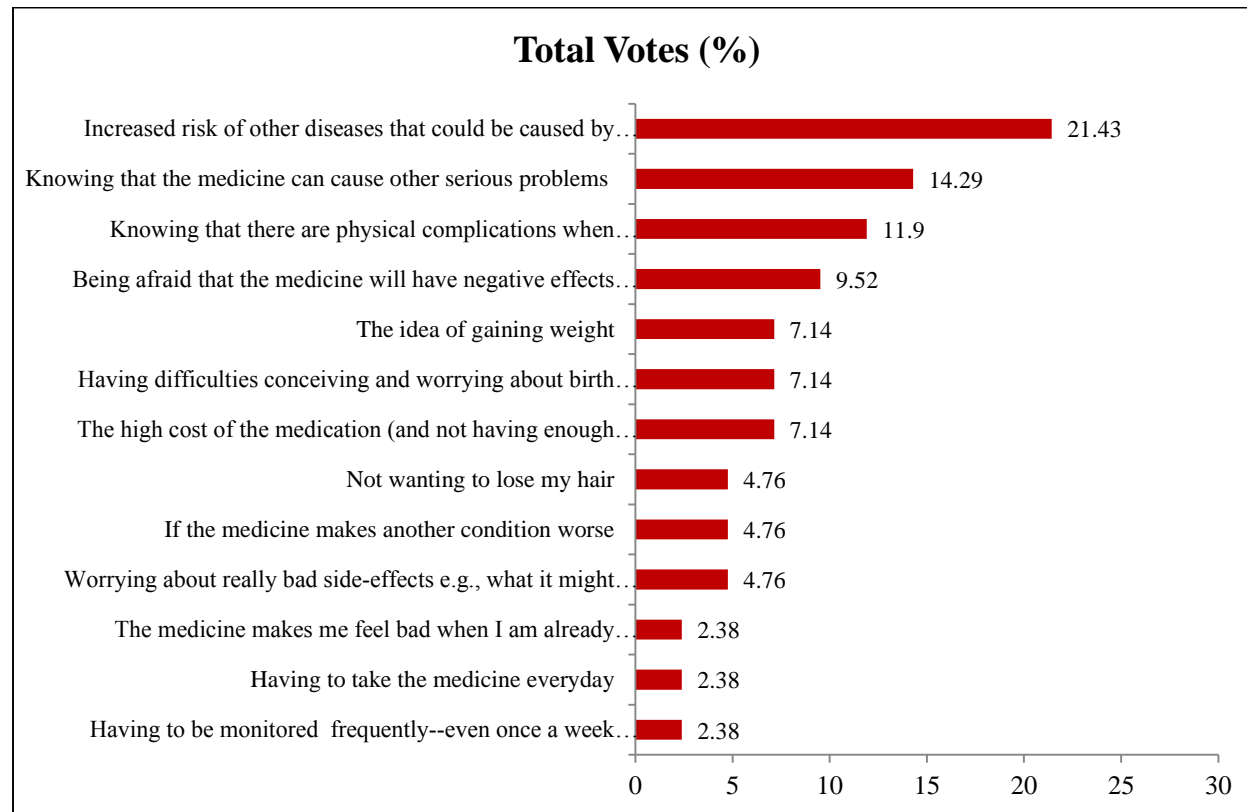



**Supplementary Table 1. Patient quotes related to the most common concerns/barriers**

| Concern/barrier                                               | Patient Quotes                                                                                                                                                                                                                                                                                                                                                                                                                                                                                                                                                                                                                                                                                                                                                                                                                                                                                                                                               |
|---------------------------------------------------------------|--------------------------------------------------------------------------------------------------------------------------------------------------------------------------------------------------------------------------------------------------------------------------------------------------------------------------------------------------------------------------------------------------------------------------------------------------------------------------------------------------------------------------------------------------------------------------------------------------------------------------------------------------------------------------------------------------------------------------------------------------------------------------------------------------------------------------------------------------------------------------------------------------------------------------------------------------------------|
| Medication side effects, real and perceived, and their impact | <p>“Worry about side effects”</p> <p>“fears and concerns about side effects”</p> <p>“worrying about long-term consequences or risks”</p> <p>“Concern that taking this medication can hurt you over the long run”</p> <p>“Concerned about long-term side effects of medications”</p> <p>“experiencing side effects what badly worsen quality of life”,</p> <p>“very easy to get sick when taking medication”</p> <p>“The medicine makes me feel bad when I am already feeling pretty bad (crappy)”</p> <p>“wondering if it will harm my other vital organs”</p> <p>“worrying about further organ damage”</p> <p>“wondering if it will cause damage to my kidneys”</p> <p>“medication can cause serious problems and can make things worse”</p> <p>“afraid my heart can stop working”</p> <p>“If it complicates diabetes”</p> <p>“other medical conditions may occur (due to the medication)”;</p> <p>“If the medication interacts with other medications”</p> |
| Cost and economic barrier                                     | <p>“The cost/expense of medications and ability to afford them”</p> <p>“high cost of the medication”</p> <p>“insurance does not cover medications”</p>                                                                                                                                                                                                                                                                                                                                                                                                                                                                                                                                                                                                                                                                                                                                                                                                       |
| Impact on physical appearance (weight gain, puffy face etc.)  | <p>“Worry about gaining weights”</p> <p>“Getting a swollen face from the medicine”</p> <p>“getting a puffy face from the medication”</p> <p>“being afraid that the medication will have negative effects on my physical appearance, for example, puffy face, stretch marks”</p> <p>“Not wanting to lose my hair”</p>                                                                                                                                                                                                                                                                                                                                                                                                                                                                                                                                                                                                                                         |
| Doubts about the efficacy of the immunosuppressive medication | <p>“Uncertainty about the medication effectiveness and if it works for me”</p> <p>“hard to know the consequences of deciding whether it is better to take the medication or not take the medication”</p> <p>“medication doesn’t make you feel well”</p> <p>“lack of scientific evidence of the medication's efficacy”</p>                                                                                                                                                                                                                                                                                                                                                                                                                                                                                                                                                                                                                                    |

|                                                                                                              |                                                                                                                                                                                                                                                                                                                                                                                                             |
|--------------------------------------------------------------------------------------------------------------|-------------------------------------------------------------------------------------------------------------------------------------------------------------------------------------------------------------------------------------------------------------------------------------------------------------------------------------------------------------------------------------------------------------|
| Too much medication                                                                                          | “just don't want to take the medication”<br>“tired of having to take so many pills”<br>“already take a bunch of medications and don't want to take another one”<br>“take so many medications and they are all at different time of the day”                                                                                                                                                                 |
| Increased risk of other diseases that could be caused by taking medicines                                    | “causes other problems (e.g., vision loss)”<br>“very easy to get sick in general when taking the medicine”<br>“The risk factors with the medication (e.g., other medical conditions may occur)”                                                                                                                                                                                                             |
| Medication interfering with normal life activities:<br>In four nominal groups, patients were concerned about | “having medication interferes with normal life activities”<br>“having the medication interfere with your daily life, e.g., not being able to do things you want to”<br>“The negative effects that taking the medication will have on your family--not being able to be "there" for them”                                                                                                                    |
| Pregnancy issues                                                                                             | “having difficulties conceiving and worrying about birth defects that could be caused by the medicine”<br>“Not wanting to take the medications so that you can get pregnant”<br>“worrying about how the medication could affect pregnancy”                                                                                                                                                                  |
| Complicated and Inconvenient ways of taking medications                                                      | “trouble being able to maintain consistent regimen due to different schedules of the medications”<br>“Having to be monitored frequently--even once a week would make it hard”<br>“Do not like injection” and “Have difficulties in taking large pills”                                                                                                                                                      |
| Other perceived barriers                                                                                     | “Not having confidence/trust in my doctor”<br>“Not having enough information about the medication”<br>“Having to take it for a long time”<br>“Hearing that someone else had a bad experience from taking the medication”<br>“Not wanting to have mood swings/depressions/anxiety”, “Responsibility and ability to take medication as prescribed”, and “Worrying about drug dependency or becoming addicted” |
